# Supplementary material for: How to communicate with patients about future illness progression and end of life: a systematic review
Source: HighWire-hosted journal article supplement (doi:10.1136/bmjspcare-2014-000649), 2014-10-24
Supplement: bmjspcare-2014-000649supp_table1.pdf [file bmjspcare-2014-000649supp_table1.pdf]

**Supplementary Table 1: Characteristics of included studies**

| <b>Study, Country</b>           | <b>Academic field of publication</b> | <b>Data characteristics:</b> <ul style="list-style-type: none"> <li>• <b>Setting, participants</b></li> <li>• <b>Data amounts</b></li> <li>• <b>Whether data were audio only or audio-visual</b></li> </ul>                                                                                 | <b>Analysis characteristics</b><br><b>Summary rating of level analytic detail (in capitals)</b> | <b>Contributes to review findings in terms of:</b>                                                                                                                                                                                                 |
|---------------------------------|--------------------------------------|---------------------------------------------------------------------------------------------------------------------------------------------------------------------------------------------------------------------------------------------------------------------------------------------|-------------------------------------------------------------------------------------------------|----------------------------------------------------------------------------------------------------------------------------------------------------------------------------------------------------------------------------------------------------|
| Alhuwalia et al[23] (2013) USA  | Clinical                             | <ul style="list-style-type: none"> <li>• Outpatient cardiology clinic: 71 appointments, 52 patients recently discharged after hospitalisation, 44 doctors mostly primary care, some cardiologists</li> <li>• 25 episodes of advance care planning analysed</li> <li>• Audio only</li> </ul> | Qualitative content analysis<br>Only the doctors' talk<br>What is said but not how<br>LOW       | <ul style="list-style-type: none"> <li>• Indirectness, allusive talk</li> <li>• Hypothetical questions and talk</li> </ul>                                                                                                                         |
| Beach[24] (2003) USA            | Language and social interaction      | <ul style="list-style-type: none"> <li>• Family phone calls: 3 family members, one diagnosed with cancer</li> <li>• Total 54 calls over 13 months. 100 episodes analysed.</li> <li>• Audio only</li> </ul>                                                                                  | Conversation analysis<br>Sequences<br>What is said but not how<br>HIGH                          | <ul style="list-style-type: none"> <li>• Shifting to the positive</li> </ul>                                                                                                                                                                       |
| Leydon[25] (2008) UK            | Clinical                             | <ul style="list-style-type: none"> <li>• Oncology: 3 clinics, 3 oncologists and 28 adults with cancer referred for radio- or chemotherapy</li> <li>• Total 28 consultations. Number of episodes analysed not stated</li> <li>• Audio-visual</li> </ul>                                      | Conversation analysis<br>Sequences<br>What is said and how it is said<br>HIGH                   | <ul style="list-style-type: none"> <li>• Shifting to the positive</li> </ul>                                                                                                                                                                       |
| Lutfey & Maynard[26] (1998) USA | Language and social interaction      | <ul style="list-style-type: none"> <li>• Oncology: one clinic, one oncologist, 3 patients with terminal cancer and their partners. Delivery of news the patient's cancer is not curable</li> <li>• Total 3 consultations analysed in full</li> <li>• Audio-visual</li> </ul>                | Conversation analysis<br>Sequences<br>What is said and how it is said<br>HIGH                   | <ul style="list-style-type: none"> <li>• Fishing questions</li> <li>• Indirectness, allusive talk and euphemisms</li> <li>• Hypothetical questions and talk</li> <li>• Communications other than words that display sensitivity (touch)</li> </ul> |

*Communicating about illness progression and end of life\_ Supplementary Table 1*

|                                        |                                 |                                                                                                                                                                                                                                                                                                                                    |                                                                                                                         |                                                                                                                                                                                                                        |
|----------------------------------------|---------------------------------|------------------------------------------------------------------------------------------------------------------------------------------------------------------------------------------------------------------------------------------------------------------------------------------------------------------------------------|-------------------------------------------------------------------------------------------------------------------------|------------------------------------------------------------------------------------------------------------------------------------------------------------------------------------------------------------------------|
| Maynard & Frankel[27] (2003) USA       | Language and social interaction | <ul style="list-style-type: none"> <li>• Primary care consultation about mammogram result indicating a density of unknown origin</li> <li>• One consultation, one follow up phone call analysed in full</li> <li>• Audio only</li> </ul>                                                                                           | Conversation analysis Sequences<br>What is said and how it is said<br>HIGH                                              | <ul style="list-style-type: none"> <li>• Shifting to the positive</li> <li>• Indirectness, allusive talk and euphemisms</li> </ul>                                                                                     |
| Miller & Silverman[28] (1995) UK & USA | Sociology                       | <ul style="list-style-type: none"> <li>• Counselling in one UK HIV clinic and one US family therapy clinic</li> <li>• Total dataset not stated, number of episodes analysed not stated</li> <li>• Audio-visual</li> </ul>                                                                                                          | Foucauldian, ethnomethodological and conversation analytic Sequences<br>What is said and how it is said<br>HIGH         | <ul style="list-style-type: none"> <li>• Hypothetical talk</li> <li>• Fishing questions</li> <li>• Linking questions and proposals with what patients have said (or not said)</li> </ul>                               |
| Norton et al[29] (2013) USA            |                                 | <ul style="list-style-type: none"> <li>• Inpatient palliative care team consultations, 66 interactions, 66 patients, 13 doctors, 2 nurse practitioners</li> <li>• Total 66 recordings, number that relate to each specific finding not stated</li> <li>• Audio only</li> </ul>                                                     | Qualitative analysis (citations suggest grounded theory approach)<br>Clinicians' talk only<br>What is said, but not how | <ul style="list-style-type: none"> <li>• Linking questions and proposals</li> </ul>                                                                                                                                    |
| Peräkylä & Bor[30] (1990) UK           | Clinical                        | <ul style="list-style-type: none"> <li>• Counselling: HIV clinic sessions for both initial testing, and for patients previously tested positive. Number of participants, clinics and recordings not stated, but more than one clinic.</li> <li>• Total dataset not stated, 53 episodes analysed</li> <li>• Audio-visual</li> </ul> | Conversation analysis Sequences<br>What is said and how it is said<br>HIGH                                              | <ul style="list-style-type: none"> <li>• Things other than words that convey sensitivity</li> <li>• Hypothetical talk</li> <li>• Linking questions and proposals with what patients have said (or not said)</li> </ul> |
| Peräkylä[31]                           | Language and social             | <ul style="list-style-type: none"> <li>• Counselling: 2 AIDS clinics, 7 counsellors, 20 patients most with family members. People being</li> </ul>                                                                                                                                                                                 | Conversation analysis Sequences                                                                                         | <ul style="list-style-type: none"> <li>• Fishing questions</li> <li>• Communications other than</li> </ul>                                                                                                             |

*Communicating about illness progression and end of life\_ Supplementary Table 1*

|                                            |                                 |                                                                                                                                                                                                                                                                                                                   |                                                                                                                                   |                                                                                                                                                                                                                                                                                  |
|--------------------------------------------|---------------------------------|-------------------------------------------------------------------------------------------------------------------------------------------------------------------------------------------------------------------------------------------------------------------------------------------------------------------|-----------------------------------------------------------------------------------------------------------------------------------|----------------------------------------------------------------------------------------------------------------------------------------------------------------------------------------------------------------------------------------------------------------------------------|
| (1993)<br>UK                               | interaction                     | <p>tested and people already diagnosed seropositive</p> <ul style="list-style-type: none"> <li>• Total dataset: 27 interviews. 76 episodes - 6 hours talk - analysed</li> <li>• Audio-visual</li> </ul>                                                                                                           | <p>What is said and how it is said</p> <p>HIGH</p>                                                                                | <p>words that convey sensitivity</p> <ul style="list-style-type: none"> <li>• Hypothetical questions and talk</li> <li>• Linking questions and proposals with what patients have said (or not said)</li> <li>• Framing difficult future issue as universal or general</li> </ul> |
| Peräkylä[32]<br>(1995)<br>UK               | Language and social interaction | <ul style="list-style-type: none"> <li>• Counselling: 2 AIDS clinics, 7 counsellors, 20 patients most with family members. People being tested and people already diagnosed seropositive</li> <li>• Total dataset: 27 interviews. 76 episodes - 6 hours talk - analysed</li> <li>• Audio-visual</li> </ul>        | <p>Conversation analysis</p> <p>Sequences</p> <p>What is said and how it is said</p> <p>HIGH</p>                                  | <ul style="list-style-type: none"> <li>• Fishing questions</li> <li>• Linking of questions to what patient has said (or not said)</li> <li>• Hypothetical questions</li> </ul>                                                                                                   |
| Rodriguez et al[33]<br>(2007)<br>Australia | Clinical                        | <ul style="list-style-type: none"> <li>• Oncology: 2 outpatient clinics, 6 oncologists, 29 patients with terminal metastatic cancer, most with family member present</li> <li>• Total 175 episodes comprising single statements, not sequences</li> <li>• Verbatim transcripts analysed.</li> </ul>               | <p>Content analysis</p> <p>Single statements</p> <p>What is said but not how it is said</p> <p>LOW</p>                            | <ul style="list-style-type: none"> <li>• Indirectness, allusive talk and euphemisms</li> <li>• Framing difficult future issue as universal or general</li> </ul>                                                                                                                 |
| Rodriguez et al[34]<br>(2008)<br>Australia | Clinical                        | <ul style="list-style-type: none"> <li>• Oncology: 2 outpatient clinics, 6 oncologists, 29 patients with terminal metastatic cancer, most with family member present</li> <li>• Total 175 episodes comprising single statements, not sequences</li> <li>• Verbatim transcripts of audio data analysed.</li> </ul> | <p>Qualitative, constant comparison and coding</p> <p>Single statements</p> <p>What is said but not how it is said</p> <p>LOW</p> | <ul style="list-style-type: none"> <li>• Indirectness, allusive talk and euphemisms</li> <li>• Framing difficult future issue as universal or general</li> </ul>                                                                                                                 |
| Sarangi &                                  | Sociology                       | <ul style="list-style-type: none"> <li>• Counselling: One clinic for counselling concerning</li> </ul>                                                                                                                                                                                                            | Discourse analysis                                                                                                                | <ul style="list-style-type: none"> <li>• Hypothetical questions and</li> </ul>                                                                                                                                                                                                   |

*Communicating about illness progression and end of life\_ Supplementary Table 1*

|                                          |                                 |                                                                                                                                                                                                                                                                                                                                                                               |                                                                                                               |                                                                                                                                                                                                                                                                                                                                  |
|------------------------------------------|---------------------------------|-------------------------------------------------------------------------------------------------------------------------------------------------------------------------------------------------------------------------------------------------------------------------------------------------------------------------------------------------------------------------------|---------------------------------------------------------------------------------------------------------------|----------------------------------------------------------------------------------------------------------------------------------------------------------------------------------------------------------------------------------------------------------------------------------------------------------------------------------|
| Clarke[35]<br>(2002)<br>?UK              |                                 | <p>childhood genetic testing. Inferably UK, but not stated</p> <ul style="list-style-type: none"> <li>• Total one consultation involving one genetic counsellor and one mother. Number of episodes analysed not stated</li> <li>• Type of data not stated - appears to be audio</li> </ul>                                                                                    | <p>Sequences</p> <p>What is said, limited attention to how it is said<br/>MODERATE</p>                        | <p>talk</p>                                                                                                                                                                                                                                                                                                                      |
| Sarangi[36]<br>(2010)<br>?UK             | Language and social interaction | <ul style="list-style-type: none"> <li>• Counselling for genetic testing decisions. Apparently UK but not stated. One family member considering testing, husband, nurse and counsellor</li> <li>• Total data set four sessions, number of episodes not stated, appears to be analysis of one consultation</li> <li>• Type of data not stated - appears to be audio</li> </ul> | <p>Discourse analysis<br/>Sequences</p> <p>What is said, limited attention to how it is said<br/>MODERATE</p> | <ul style="list-style-type: none"> <li>• Hypothetical questions and talk</li> </ul>                                                                                                                                                                                                                                              |
| Silverman & Peräkylä[37]<br>(1990)<br>UK | Sociology                       | <ul style="list-style-type: none"> <li>• Counselling: 4 AIDS clinics. Counsellors and patients either coming for an HIV test or diagnosed as seropositive</li> <li>• Total dataset not stated. 100 episodes analysed<br/>Mixture of audio-visual and audio</li> </ul>                                                                                                         | <p>Conversation analysis<br/>Sequences</p> <p>What is said and how it is said<br/>HIGH</p>                    | <ul style="list-style-type: none"> <li>• Communications other than words that display sensitivity</li> <li>• Communications other than words that encourage patient to talk once topic has been broached</li> <li>• Framing difficult future issue as universal or general</li> <li>• Hypothetical questions and talk</li> </ul> |
| Speer & Parsons[38]<br>(2006)<br>UK      | Language and social interaction | <ul style="list-style-type: none"> <li>• Psychiatric assessment at one gender identity clinic. 95 patients and 2 psychiatrists</li> <li>• Total dataset: 95 consultations. 6 episodes analysed</li> <li>• Audio</li> </ul>                                                                                                                                                    | <p>Conversation analysis<br/>Sequences</p> <p>What is said and how it is said<br/>HIGH</p>                    | <ul style="list-style-type: none"> <li>• Hypothetical questions and talk</li> </ul>                                                                                                                                                                                                                                              |

*Communicating about illness progression and end of life\_ Supplementary Table 1*

|                                   |                                       |                                                                                                                                                                                                                                                                                                                                                                                              |                                                                                                                                                  |                                                                                                                                                                                                                        |
|-----------------------------------|---------------------------------------|----------------------------------------------------------------------------------------------------------------------------------------------------------------------------------------------------------------------------------------------------------------------------------------------------------------------------------------------------------------------------------------------|--------------------------------------------------------------------------------------------------------------------------------------------------|------------------------------------------------------------------------------------------------------------------------------------------------------------------------------------------------------------------------|
| Speer[39]<br>(2010)<br>UK         | Language<br>and social<br>interaction | <ul style="list-style-type: none"> <li>• Psychiatric assessment at one gender identity clinic. 89 transsexual patients and 6 psychiatrists</li> <li>• Total dataset 289 sessions. 30 episodes analysed</li> <li>• Mixed data: mostly audio, some audio-visual</li> </ul>                                                                                                                     | <p>Conversation analysis<br/>Sequences<br/>What is said<br/>And how it is said<br/>HIGH</p>                                                      | <ul style="list-style-type: none"> <li>• Hypothetical questions and talk</li> <li>• Fishing questions</li> <li>• Linking of questions to what patient has said (or not said)</li> </ul>                                |
| Tulsky et al[40]<br>(1998)<br>USA | Clinical                              | <ul style="list-style-type: none"> <li>• Primary care: five practices. 56 doctors with 56 of their established patients who had a serious medical illness discussing advance directives as part of a research study intervention, rather than spontaneously</li> <li>• Total: 56 consultations. 52 episodes analysed</li> <li>• Verbatim transcripts of audio-recordings analysed</li> </ul> | <p>Qualitative and coding<br/>Doctors' talk only<br/>What is said but not how it is said<br/>LOW</p>                                             | <ul style="list-style-type: none"> <li>• Hypothetical questions and talk</li> <li>• Indirectness, allusive talk and euphemisms</li> </ul>                                                                              |
| Wade et al[41]<br>(2009)<br>UK    | Sociology                             | <ul style="list-style-type: none"> <li>• Recruitment to a research trial: 3 centres, 23 men and 12 trial recruitment staff</li> <li>• Total: 23 conversations. Number of episodes analysed not stated</li> <li>• Audio</li> </ul>                                                                                                                                                            | <p>Thematic, content &amp; conversation analysis<br/>Sequences<br/>Some limited attention to how it is said - specifically to pauses<br/>LOW</p> | <ul style="list-style-type: none"> <li>• Communications other than words that encourage patient to talk once topic has been broached</li> <li>• Linking of questions to what patient has said (or not said)</li> </ul> |
